# Supplementary material
Source: PubMed Central journal article supplement (PMC9710005)
Supplement: NIHMS1848769-supplement-1.pdf [file NIHMS1848769-supplement-1.pdf]

Supplement A. Benefit on palpitations from intervention articles (n=33).

| <i>Author, year</i>                  | <i>Result-prevalence</i>                                                                                | <i>Result-severity</i>                                                                                                                                                                                                                 | <i>Comparison</i>                                                                                                                               |
|--------------------------------------|---------------------------------------------------------------------------------------------------------|----------------------------------------------------------------------------------------------------------------------------------------------------------------------------------------------------------------------------------------|-------------------------------------------------------------------------------------------------------------------------------------------------|
| <u>DRUG THERAPIES (n=15)</u>         |                                                                                                         |                                                                                                                                                                                                                                        |                                                                                                                                                 |
| <u>Hormonal agents (n=14)</u>        |                                                                                                         |                                                                                                                                                                                                                                        |                                                                                                                                                 |
| Anarte et al., 1998<br>[36]          |                                                                                                         | HT + Psychological pre tx 1.00 (0.81) and post tx 0.18 (0.39), p<0.0001; HT pre tx 0.63 (0.72) and post tx 1.19 (0.74), p=0.0026                                                                                                       | Severity in HT + psychological group significantly lower than in HT group at post tx (p=0.0001)                                                 |
| Carmignani et al., 2010 [38]         |                                                                                                         | All three groups (HT, isoflavone, or placebo) improved over time (16 weeks)                                                                                                                                                            | NS group difference (p=0.43)                                                                                                                    |
| Checa et al., 2005 [39]              | Palpitations (yes) at 6 months HT < Calcium and raloxifene groups (p=0.0004), at 12 months NS (p=0.545) |                                                                                                                                                                                                                                        | Prevalence at 6 months HT < Calcium and raloxifene groups (p=0.0004), at 12 months NS (p=0.545); text does not match table results at 12 months |
| Chittacharoen et al., 2004 [40]      |                                                                                                         | Among 38 women with palpitations, 26.3% improved, 60.5% unchanged, 13.2% worsened at 6 months                                                                                                                                          | NA                                                                                                                                              |
| Elfituri et al., 2005 [41]           |                                                                                                         | Severity significantly decreased in both groups over time from month 0 to 3, 6, 12 months: 0.82 (0.39) to 0.06 (0.24), 0 (0), 0 (0) for tibolone group (p's < 0.001); 0.74 (0.44) to 0.04 (0.2), 0 (0), 0 (0) for HT group (p's<0.001) | NS group difference for severity change from months 0 to 3 or 3 to 6                                                                            |
| Fluck et al., 2002 <sup>a</sup> [49] |                                                                                                         | Baseline and improvement data not available                                                                                                                                                                                            | Significantly less severe palpitations in tibolone vs. untreated group (p<0.05).                                                                |

|                                |                                                          |                                                                                                                                                                                                                                                                               |                                                                    |
|--------------------------------|----------------------------------------------------------|-------------------------------------------------------------------------------------------------------------------------------------------------------------------------------------------------------------------------------------------------------------------------------|--------------------------------------------------------------------|
| Kim et al., 2019 [42]          |                                                          | For transdermal estrogen, 1 <sup>st</sup> heart discomfort 1.55 (1.15) to 2 <sup>nd</sup> heart discomfort 1.10 (0.98) (p=0.050); For tibolone, heart discomfort 1.42 (1.24) to 2 <sup>nd</sup> heart discomfort 0.85 (0.83) (p=0.029) from pre- to posttreatment at 6 months | NS group difference                                                |
| Moyer et al., 2018 [43]        |                                                          | NS palpitations improved on HT (oral or transdermal estrogen) and placebo                                                                                                                                                                                                     | NS group difference                                                |
| Nevinny-Stickel, 1983 [50]     |                                                          | NS palpitations improvement from both tibolone (Org OD 14) and placebo                                                                                                                                                                                                        | Tibolone = placebo                                                 |
| Polo-Kantola et al., 1998 [44] |                                                          | No effect on palpitations from transdermal estradiol (estrogel and evorel) group and placebo group                                                                                                                                                                            | NS group difference                                                |
| Pornel 1996 [45]               | All groups incidence of palpitations decreased over time | All groups (Menorest, Premarin, and Estraderm) severity of palpitations decreased over time, less than 1.3% of women reported severe palpitations at 12 weeks after treatments                                                                                                | NS group differences in incidence and severity reduction over time |
| Takamatsu et al., 2001 [46]    |                                                          | 56.8% (n=25) improved palpitations with counseling, 9.1% no response in palpitations with counseling for 6 months                                                                                                                                                             | Greater improvement in palpitation in counseling than HT           |
| Tit et al., 2017 [47]          |                                                          | At 6 months, palpitations improved for 15.79% on HT, 14.52% on isoflavones/phytoestrogens, 10.38% untreated control; at 12 months, palpitations improved for 20.00% on HT, 17.75% on isoflavones/phytoestrogens,                                                              | HT, isoflavones not reported                                       |

|                                                                              |                                                                                                                                                                                                                                                                                                                                                                                            |                                                                                                |
|------------------------------------------------------------------------------|--------------------------------------------------------------------------------------------------------------------------------------------------------------------------------------------------------------------------------------------------------------------------------------------------------------------------------------------------------------------------------------------|------------------------------------------------------------------------------------------------|
|                                                                              | 16.03% control                                                                                                                                                                                                                                                                                                                                                                             |                                                                                                |
| Glaser et al., 2011 [48]                                                     | Mean ↓: 1.06 to 0.29 (pre-post tx at 3 months, p<0.0001)                                                                                                                                                                                                                                                                                                                                   | NA                                                                                             |
| <u>Non-hormonal drug therapies – Antihypertensives (n=1)</u>                 |                                                                                                                                                                                                                                                                                                                                                                                            |                                                                                                |
| Kujala et al., 2014 [54]                                                     | Both groups (severity) improved over time (8 weeks); Relief from palpitations in 24.5% (p=0.0315) Moxonidine; 40.8% (p=0.0012) atenolol                                                                                                                                                                                                                                                    | NS group difference in improvement on palpitations                                             |
| <u>NON-DRUG THERAPIES (n=18)</u>                                             |                                                                                                                                                                                                                                                                                                                                                                                            |                                                                                                |
| <u>Supplementary treatments – isoflavones and other phytoestrogens (n=5)</u> |                                                                                                                                                                                                                                                                                                                                                                                            |                                                                                                |
| Agosta et al., 2011 [55]                                                     | Estromineral reduced palpitations severity by 20.9%, Estromineral Serena reduced palpitations severity by 21.1% by 4th week. Estromineral reduced palpitations severity by 42.9%, Estromineral Serena reduced palpitations severity by 46.4% by 8th week. At 12 weeks, Estromineral reduced palpitations severity by 56.8%, while Estromineral Serena reduced palpitations severity by 60% | Estromineral = Estromineral Serena by palpitations improved from baseline to week 4, 8, and 12 |
| Ahsan & Mallick, 2017 [56]                                                   | Postmenopausal group, 18.81% improvement in mild to moderate symptoms (p<.05, n=11), 33.33% improvement in severe to very severe symptoms (n=2); perimenopausal group, 31.3% (n=23) improvement in mild to moderate symptoms (p<0.01), none had severe symptoms after 12-week tx                                                                                                           | NA                                                                                             |

|                                                                  |                                                                                                                                                                                                                                                             |                                                                                                                                                                         |                                                                                                                         |
|------------------------------------------------------------------|-------------------------------------------------------------------------------------------------------------------------------------------------------------------------------------------------------------------------------------------------------------|-------------------------------------------------------------------------------------------------------------------------------------------------------------------------|-------------------------------------------------------------------------------------------------------------------------|
| Auerbach et al., 2012 [57]                                       |                                                                                                                                                                                                                                                             | Severity at weeks 4, 8, 12, 24 in both Pomegranate seed oil and placebo groups was 0.0 (1.0)                                                                            | NS group difference at week 4 (p=0.31), week 8 (p=0.99), week 12 (p=0.82), or week 24 (p=0.08)                          |
| Costa et al., 2017 [58]                                          | More asymptomatic women in both isoflavone + exercise and placebo + exercise groups                                                                                                                                                                         | Less severe symptom in both isoflavone + exercise and placebo + exercise groups after 10 weeks tx                                                                       | NS group differences in (1) frequency of women with no, mild, mod, or severe symptom and (2) % disappearance of symptom |
| Davinelli et al., 2017 [59]                                      | 78.8% reduction in palpitations with Equopausa group(p<0.001). Sig reduction in palpitations from 63.3% to 23.3% at 1 month (p<0.01), to 13.4% at 3 months within Equopausa group (p<0.001); in placebo from 66.7% to 43.4% at 1 month, to 36.7 at 3 months |                                                                                                                                                                         | Reporting mild palpitations in Equopausa vs. placebo at 3 month 13.4% vs. 36.7% (p < 0.001)                             |
| <u>Supplementary treatments – <i>Rheum rhaponticum</i> (n=3)</u> |                                                                                                                                                                                                                                                             |                                                                                                                                                                         |                                                                                                                         |
| Hasper et al., 2009 <sup>b</sup> [60]                            |                                                                                                                                                                                                                                                             | Mean heart complaints changed from baseline to week 48 to week 96: ERr 731 group 3.0 (0.8) to 0.6 (0.5) to 0.6 (0.5), placebo group 2.9 (0.6) to 0.7 (0.6) to 0.6 (0.6) | ERr 731 = placebo at week 48 (p=0.7201) or 96 (p=0.9727)                                                                |
| Heger et al., 2006 [61]                                          |                                                                                                                                                                                                                                                             | Decrease in palpitations severity from baseline to day 84 in ERr 731 group vs. placebo (-1.5 (1.1) vs. -0.1 (0.4), [95% CI - 1.753, -1.139])                            | Sig more reduction in palpitations severity in ERr 731 group vs. placebo group (p<0.0001)                               |

|                                                                           |                                                                                                                                       |                                                                                                                                                                                                                     |                                                                                                      |
|---------------------------------------------------------------------------|---------------------------------------------------------------------------------------------------------------------------------------|---------------------------------------------------------------------------------------------------------------------------------------------------------------------------------------------------------------------|------------------------------------------------------------------------------------------------------|
| Kaszkin-Bettag et al., 2009 [62]                                          |                                                                                                                                       | Reduction in palpitations severity -1.1 (0.9) ERr 731 group vs. -0.2 (0.9) placebo group at 84 days                                                                                                                 | Less severity in palpitations in ERr 731 group at 84 days vs. placebo (p<0.0001)                     |
| <u>Supplementary treatments – <i>Salvia officinalis</i> or sage (n=3)</u> |                                                                                                                                       |                                                                                                                                                                                                                     |                                                                                                      |
| Bommer et al., 2011 [63]                                                  |                                                                                                                                       | Mean ↓: 0.9 (1.0) to 0.7 (0.9), (pre-post tx [8 weeks tx], p= 0.0022)                                                                                                                                               | NA                                                                                                   |
| Dadfar & Bamdad, 2019 [64]                                                |                                                                                                                                       | Mean ↓: 1.9 (0.175) to 1.73 (0.126) (pre-post tx [4 weeks tx], p=0.06)                                                                                                                                              | NA                                                                                                   |
| Zeidabadi et al., 2020 [65]                                               |                                                                                                                                       | Mean score of palpitations ↓ by 0.4 units in <i>Salvia officinalis</i> extract group vs. placebo group (p<0.001); after 3-month tx, lower mean score in tx group 0.58 (0.26) vs control group 1.38 (1.29), p<0.001. | More mean ↓ and less score in the <i>Salvia officinalis</i> extract group vs. placebo group p<0.001. |
| <u>Supplementary treatments – other (n=4)</u>                             |                                                                                                                                       |                                                                                                                                                                                                                     |                                                                                                      |
| Fatima et al., 2017 [66]                                                  | Prevalence reduced by 71.8% in <i>Tribulus terrestris</i> L. group and 40.6% in the placebo group from baseline to one month post tx. | Severity before to after 8-week tx in <i>Tribulus terrestris</i> L. group (2.70 (0.79), 0.76 (0.73)) vs. placebo group (2.46 (1.20), 1.49 (1.01)).                                                                  | ↓ in prevalence and severity: <i>Tribulus terrestris</i> L. > placebo over time, p < 0.0001          |
| Modi et al., 2012 [67]                                                    |                                                                                                                                       | Among women with palpitations (n=25), mean ↓: 0.49 to 0.08 (84% ↓), (pre-post tx [3 months tx], p<0.01)                                                                                                             | NA                                                                                                   |
| Nayak et al., 2011 [68]                                                   | The percentage of women with palpitations ↓ from 68.16% (152/223) pre-tx to                                                           | Among women with palpitations, mean ↓: (n=152) 1.31 (0.46) to (n=26) 1.04 (0.20) (pre-post tx at 1 year, p=0.001)                                                                                                   | NA                                                                                                   |

11.66% (26/223) post tx

|                                                                       |                                                                                                                                                                                               |                                                                                                                              |
|-----------------------------------------------------------------------|-----------------------------------------------------------------------------------------------------------------------------------------------------------------------------------------------|------------------------------------------------------------------------------------------------------------------------------|
| Park & Kim, 2016<br>[69]                                              | Palpitation severity at 12 weeks<br><i>Schisandra chinensis</i> 0.50 (0.71) vs.<br>placebo 1.06 (0.75); about 50% reduction<br>in palpitation score from baseline to 12<br>weeks in tx group. | Significant greater ↓ in palpitation<br>severity over time in <i>Schisandra<br/>chinensis</i> vs. placebo group<br>(p=0.015) |
| <u>Psychological intervention (n=2)</u><br>Alder et al., 2006<br>[70] | Mean ↓: 1st baseline 1.4 (1.7), 2nd<br>baseline 1.7 (2.1); to 0.8 (0.6) (p < 0.01);<br>(average pre-post tx [3 months tx],<br>p=0.007)                                                        | NA                                                                                                                           |
| Qian et al., 2010<br>[71]                                             | Mean ↓: 2.74 (1.65) to post tx 0.34 (0.45)<br>(pre-post, p < .05) after 6-month tx with<br>both. No Δ after treatment with herbal<br>alone and psychological alone (p>0.05)                   | Herbal + psychological > herbal<br>alone or psychological alone                                                              |
| <u>Acupressure (n=1)</u><br>Kung et al., 2011<br>[72]                 | Mean ↓: 1.9 (0.3) to 0.7 (0.3) (pre-post tx<br>[4 weeks tx], p=0.02)                                                                                                                          | NA                                                                                                                           |

Blank cells indicate not applicable; > indicates that one intervention is superior to another one; = indicates no effect difference between interventions and/or placebos.

HT = hormonal therapy, NS = non-significant, tx = treatment, NA = not applicable due to no comparison group, ERr 731 = a special extract of *Rheum rhaponticum*.

<sup>a</sup> had 25 women in untreated group.

<sup>b</sup> study with two phases.

↓, mean severity decreased; no Δ: unchanged mean severity; ↑: mean severity worsened.

Four articles were not included in this table due to palpitations being assessed only as an adverse effect of treatments: Bhattacharya 2010 [37], Callegari et al., 2019 [51], Freeman et al., 2017 [52], and Kornstein 2015 [53].

Supplement B. Assessment of bias in reviewed articles (n=37).

| <i>Author, year</i>             | <i>Bias Rating</i> | <i>Source of Bias</i>             |                       |                                           |                              |                            |                                              |
|---------------------------------|--------------------|-----------------------------------|-----------------------|-------------------------------------------|------------------------------|----------------------------|----------------------------------------------|
|                                 |                    | <i>No confounders in analysis</i> | <i>Selection bias</i> | <i>No palpitations-specific inclusion</i> | <i>No adherence analysis</i> | <i>No dropout analysis</i> | <i>No specific measurement recall period</i> |
| <u>DRUG THERAPIES (n=19)</u>    |                    |                                   |                       |                                           |                              |                            |                                              |
| <u>Hormonal agents (n=15)</u>   |                    |                                   |                       |                                           |                              |                            |                                              |
| Anarte et al., 1998 [36]        | Critical           | +                                 | +                     | +                                         | +                            | -                          | +                                            |
| Bhattacharya & Jha, 2010 [37]   | Critical           | NA                                | +                     | +                                         | +                            | -                          | +                                            |
| Carmignani et al., 2010 [38]    | Critical           | +                                 | +                     | +                                         | -                            | -                          | +                                            |
| Checa et al., 2005 [39]         | Critical           | +                                 | +                     | +                                         | +                            | -                          | +                                            |
| Chittacharoen et al., 2004 [40] | Critical           | +                                 | +                     | +                                         | +                            | +                          | +                                            |
| Elfituri et al., 2005 [41]      | Critical           | +                                 | ?                     | +                                         | +                            | -                          | +                                            |
| Fluck et al., 2002 [49]         | Critical           | +                                 | +                     | +                                         | +                            | -                          | +                                            |
| Kim et al., 2019 [42]           | Critical           | -                                 | +                     | +                                         | +                            | -                          | +                                            |
| Moyer et al., 2018 [43]         | Critical           | +                                 | ?                     | +                                         | +                            | -                          | +                                            |
| Nevinny-Stickel, 1983 [50]      | Critical           | +                                 | ?                     | +                                         | +                            | -                          | +                                            |
| Polo-Kantola et al., 1998 [44]  | Critical           | +                                 | -                     | +                                         | +                            | -                          | +                                            |
| Pornel 1996 [45]                | Critical           | +                                 | +                     | +                                         | +                            | +                          | +                                            |
| Takamatsu et al., 2001 [46]     | Critical           | +                                 | +                     | +                                         | +                            | -                          | +                                            |
| Tit et al., 2017 [47]           | Critical           | +                                 | +                     | +                                         | +                            | -                          | +                                            |
| Glaser et al., 2011 [48]        | Critical           | +                                 | +                     | +                                         | +                            | +                          | +                                            |

Non-hormonal drug therapies – SSRI/SNRI and antihypertensives (n=4)

|                             |          |    |   |   |   |   |   |
|-----------------------------|----------|----|---|---|---|---|---|
| Callegari et al., 2019 [51] | Critical | NA | + | + | + | - | + |
| Freeman et al., 2017 [52]   | Critical | NA | + | + | + | + | + |
| Kornstein et al., 2015 [53] | Critical | NA | ? | + | + | - | + |
| Kujala et al., 2014 [54]    | Critical | +  | ? | + | + | + | + |

NON-DRUG THERAPIES (n=18)

Supplementary treatments – isoflavones and other phytoestrogens (n=5)

|                             |          |   |   |   |   |   |   |
|-----------------------------|----------|---|---|---|---|---|---|
| Agosta et al., 2011 [55]    | Critical | + | + | + | + | - | + |
| Ahsan & Mallick, 2017 [56]  | Critical | + | + | + | + | - | + |
| Auerbach et al., 2012 [57]  | Critical | + | ? | + | + | - | + |
| Costa et al., 2017 [58]     | Critical | + | - | + | + | + | + |
| Davinelli et al., 2017 [59] | Critical | + | ? | + | + | - | + |

Supplementary treatments – *Rheum rhaponticum* (n=3)

|                                  |          |   |   |   |   |   |   |
|----------------------------------|----------|---|---|---|---|---|---|
| Hasper et al., 2009 [60]         | Critical | + | + | + | + | - | + |
| Heger et al., 2006 [61]          | Critical | + | + | + | + | + | + |
| Kaszkin-Bettag et al., 2009 [62] | Critical | + | + | + | - | + | + |

Supplementary treatments – *Salvia officinalis* or sage (n=3)

|                             |          |   |   |   |   |   |   |
|-----------------------------|----------|---|---|---|---|---|---|
| Bommer et al., 2011 [63]    | Critical | + | - | + | + | + | + |
| Dadfar & Bamdad, 2019 [64]  | Critical | + | + | + | + | - | + |
| Zeidabadi et al., 2020 [65] | Critical | + | + | + | + | + | + |

Supplementary treatments – other (n=4)



|                                         |          |   |   |   |   |   |   |
|-----------------------------------------|----------|---|---|---|---|---|---|
| Fatima et al., 2017 [66]                | Critical | - | ? | + | + | - | + |
| Modi et al., 2012 [67]                  | Critical | + | + | + | + | + | + |
| Nayak et al., 2011 [68]                 | Critical | + | + | + | + | + | + |
| Park & Kim, 2016 [69]                   | Critical | + | + | + | + | - | + |
| <u>Psychological intervention (n=2)</u> |          |   |   |   |   |   |   |
| Alder et al., 2006 [70]                 | Critical | + | + | + | + | + | + |
| Qian et al., 2010 [71]                  | Critical | + | + | + | + | + | + |
| <u>Auricular acupressure (n=1)</u>      |          |   |   |   |   |   |   |
| Kung et al., 2011 [72]                  | Critical | + | + | + | + | - | + |

+ high risk of bias; - low risk of bias; ? unclear

NS = non-significant, NA = not applicable due to palpitations as an adverse effect, SSRI = selective serotonin reuptake inhibitor,  
SNRI = serotonin-norepinephrine reuptake inhibitor.
